# Supplementary material for: Systematic analysis of the molecular and biophysical properties of key DNA damage response factors
Source: eLife journal article supplement (doi:10.7554/elife.87086), 2023-06-21

Figure 1-figure supplement 1-source data 1

Figure 1—figure supplement 1C

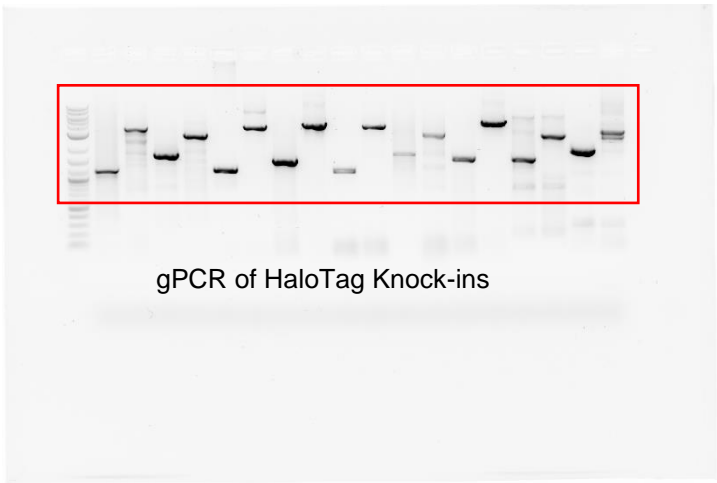

Figure 1—figure supplement 1D

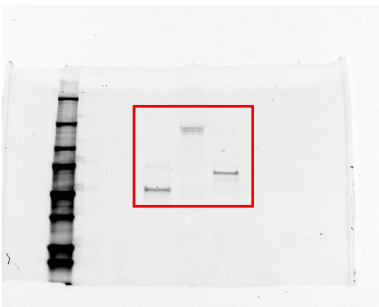

Halo-SHLD1  
Halo-SHLD2  
Halo-SHLD3

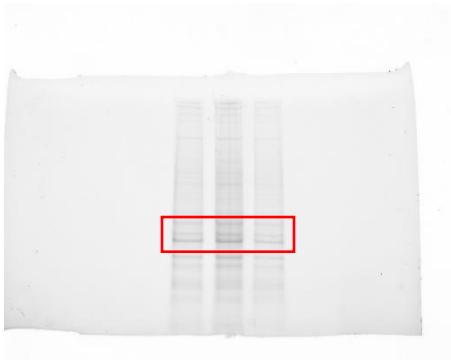

Loading Control

Figure 1—figure supplement 1F

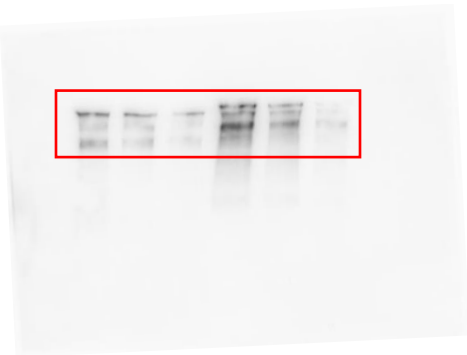

53BP1

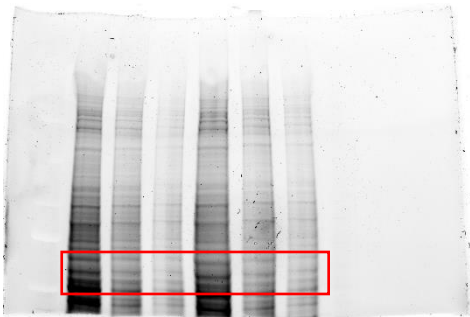

Loading Control

Figure 1-figure supplement 1-source data 1

Figure 1—figure supplement 1F, Continued

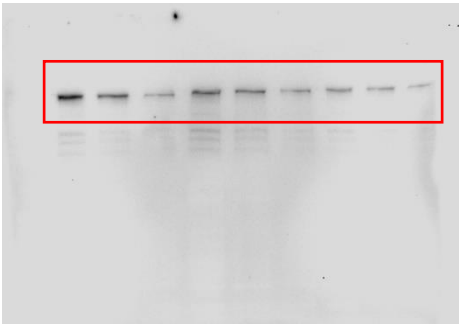

ATM

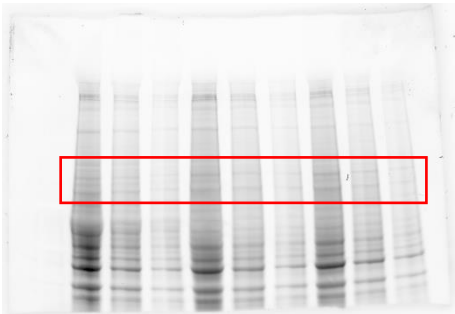

Loading Control

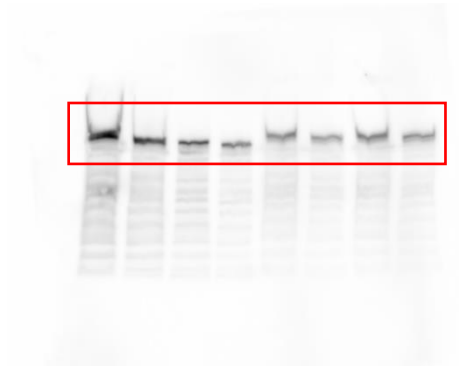

DNA-PKcs

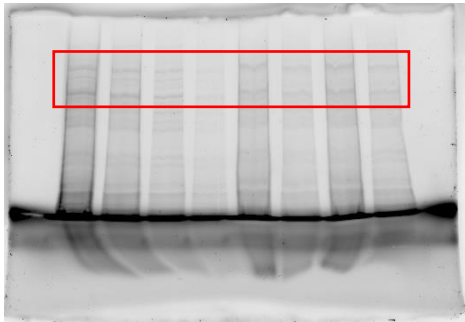

Loading Control

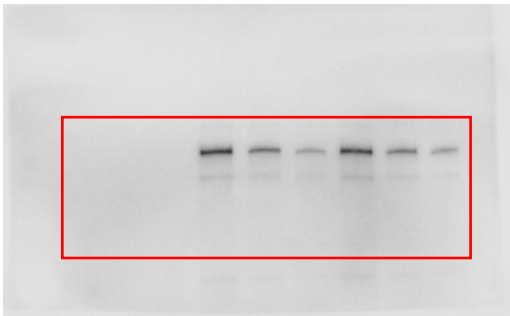

FLAG (Halo-RNF169)

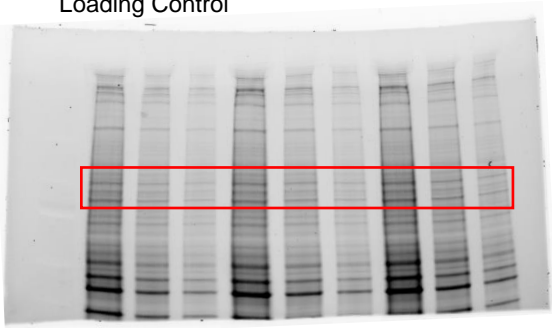

Loading Control

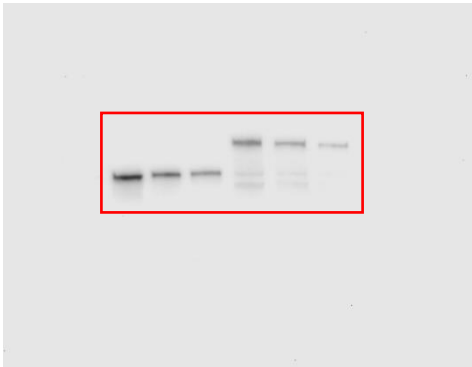

NBS1

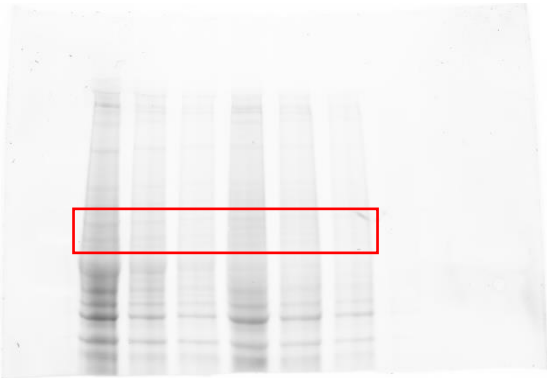

Loading Control

Figure 1-figure supplement 1-source data 1

Figure 1—figure supplement 1F, Continued

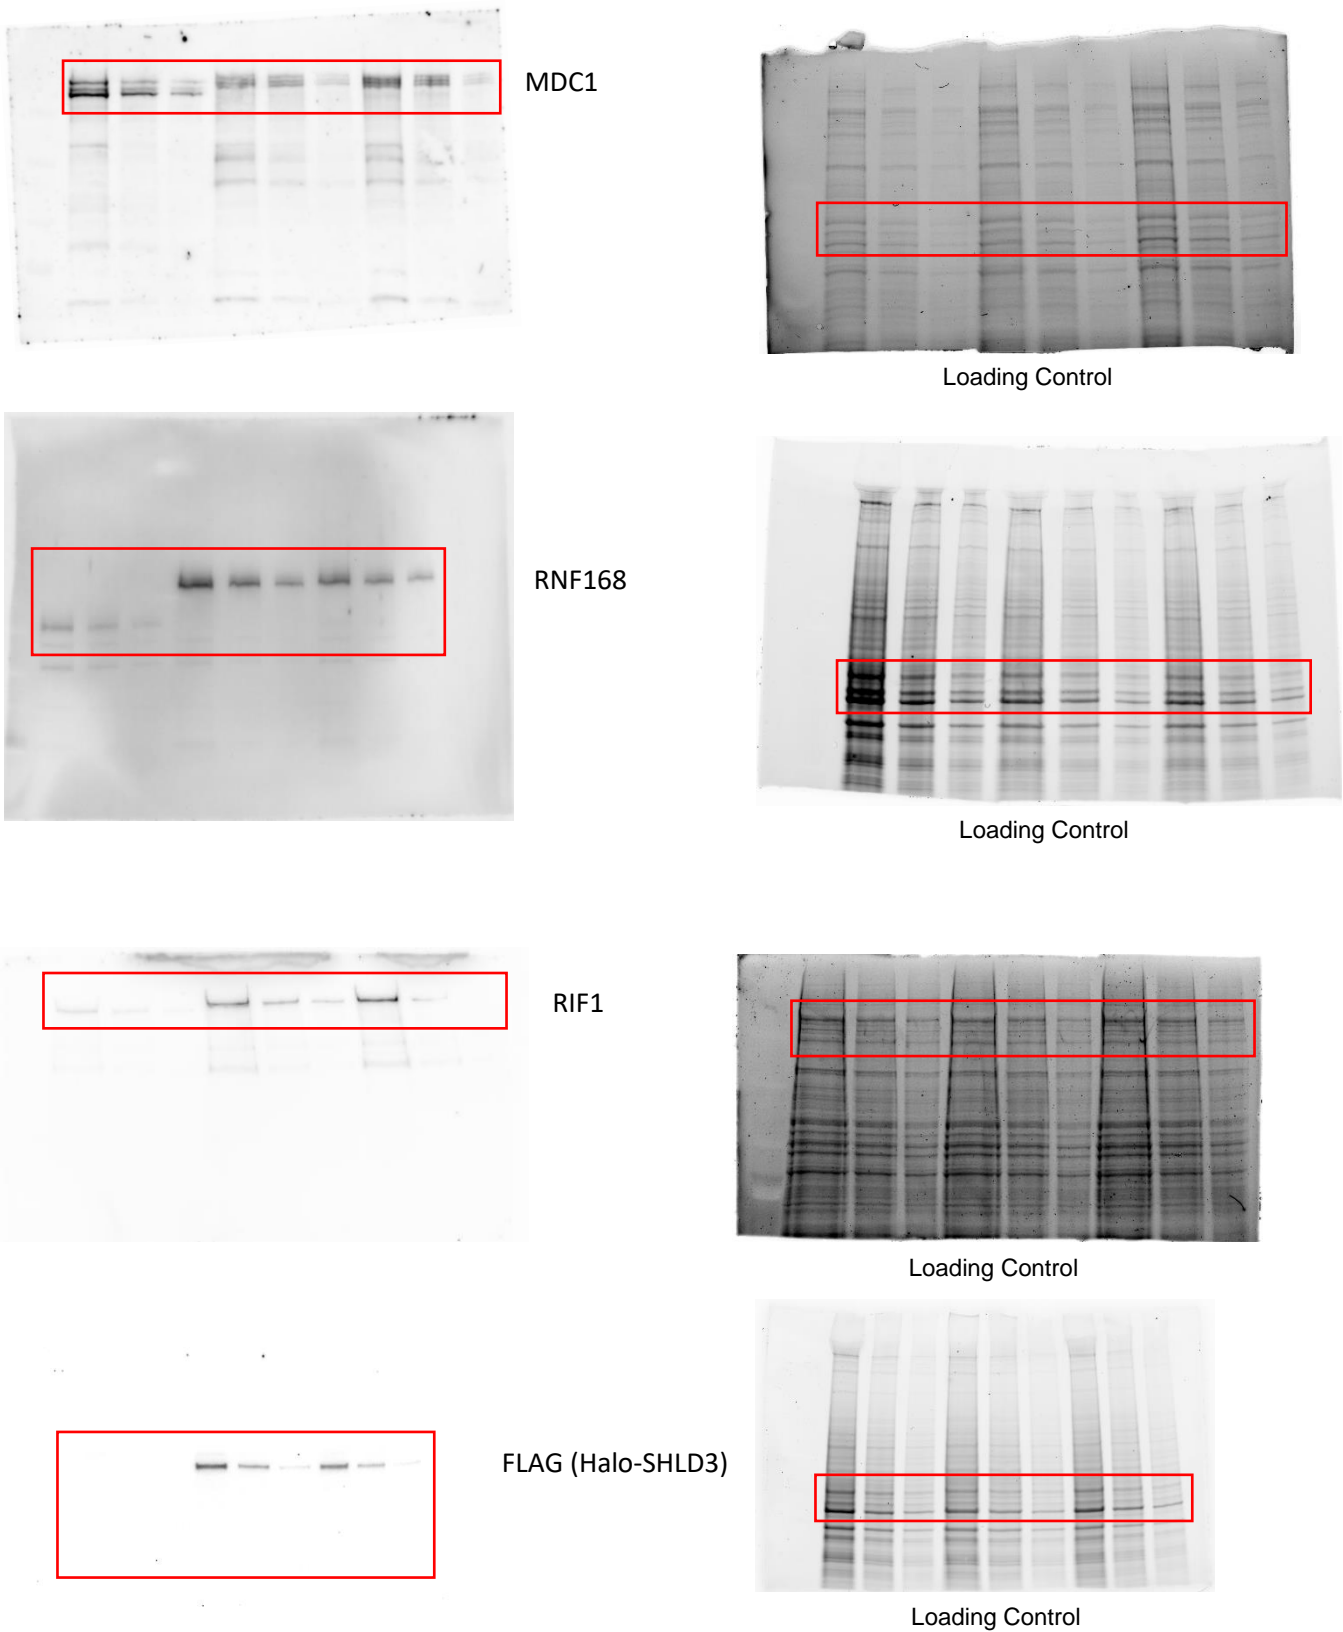

Figure 1-figure supplement 1-source data 1

Figure 1—figure supplement 1F, Continued

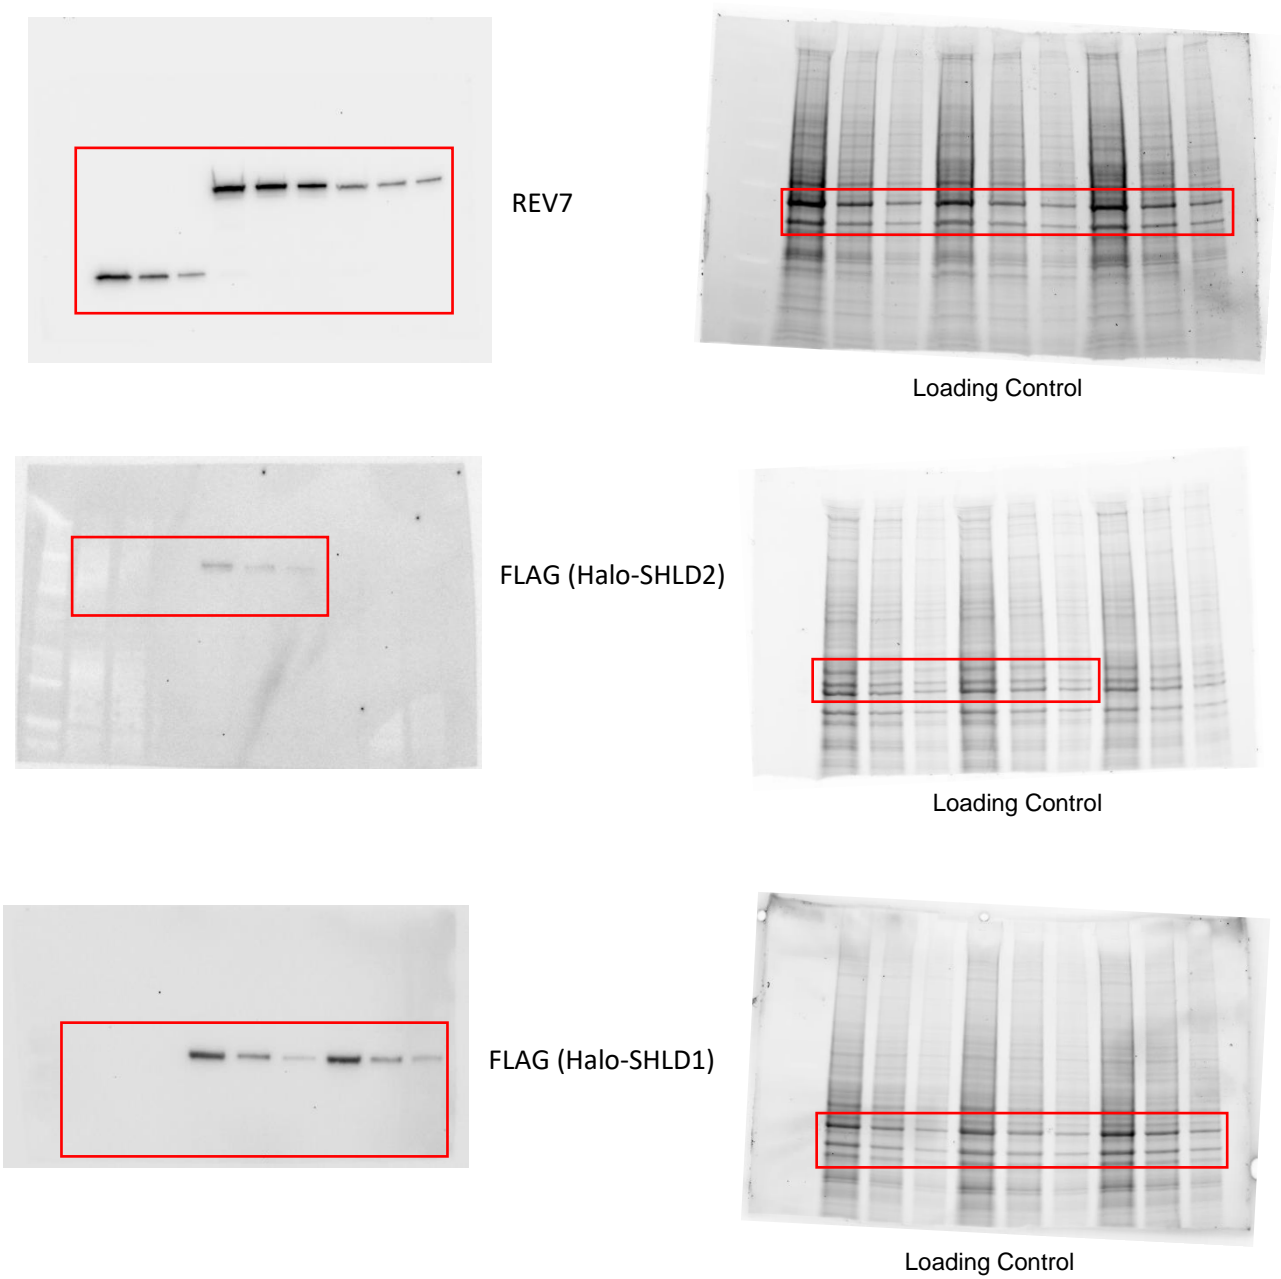

Supplement: fig1-figsupp1-data1 [file elife-87086-fig1-figsupp1-data1-v2.zip]
