# Supplementary material for: Systematic analysis of the molecular and biophysical properties of key DNA damage response factors
Source: eLife journal article supplement (doi:10.7554/elife.87086), 2023-06-21

Figure 2-figure supplement 1—source data 1

Figure 2—figure supplement 1B

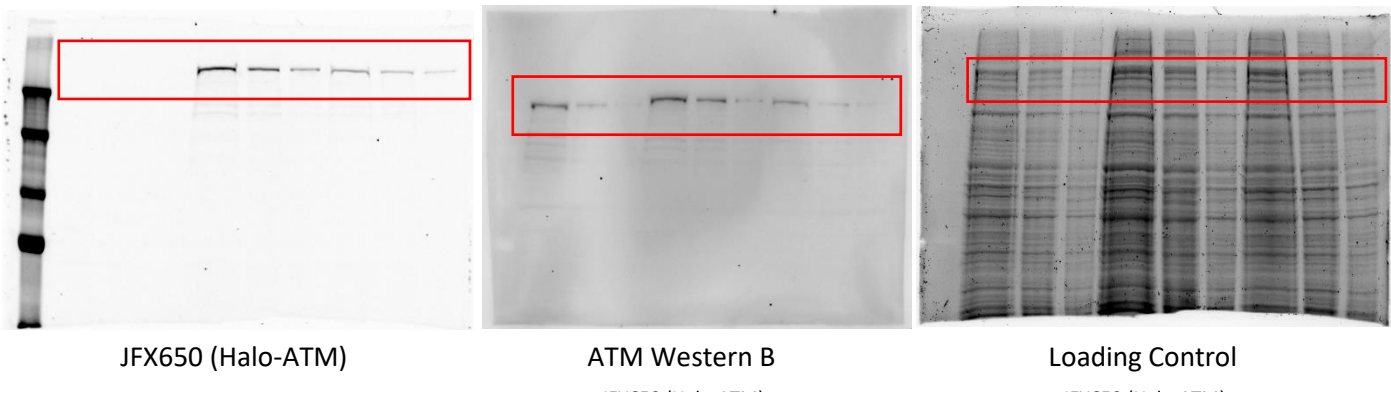

Figure 2—figure supplement 1E

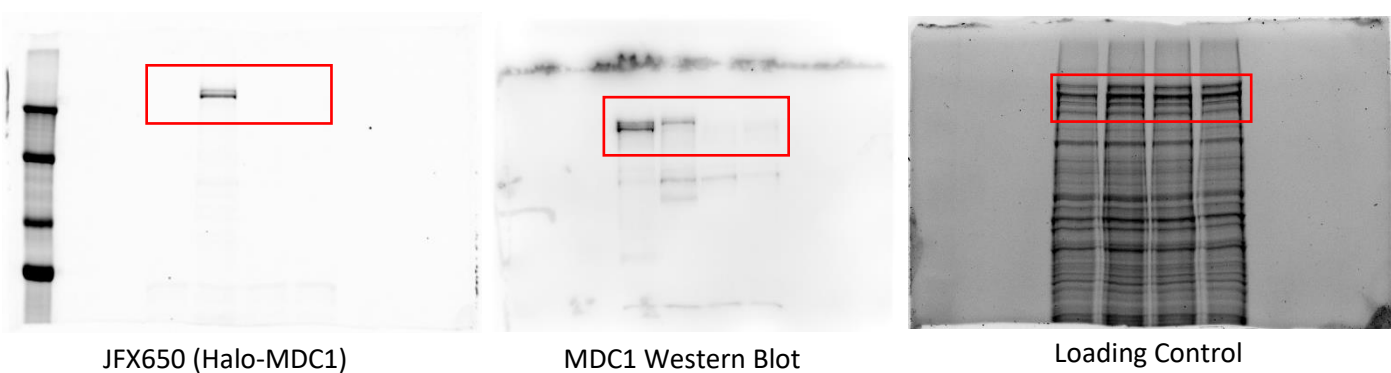

Figure 2—figure supplement 1F

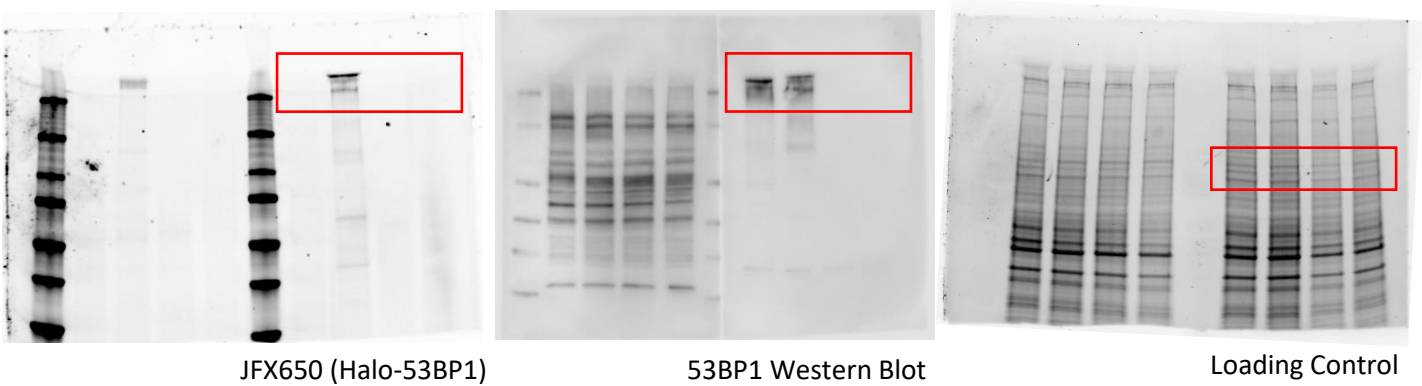

Supplement: fig2-figsupp1-data1 [file elife-87086-fig2-figsupp1-data1-v2.zip]
