# Supplementary material for: Systematic analysis of the molecular and biophysical properties of key DNA damage response factors
Source: eLife journal article supplement (doi:10.7554/elife.87086), 2023-06-21
Supplement: fig3-data1 [file elife-87086-fig3-data1-v2.zip]

## Figure 3-source data 1

### Figure 3A

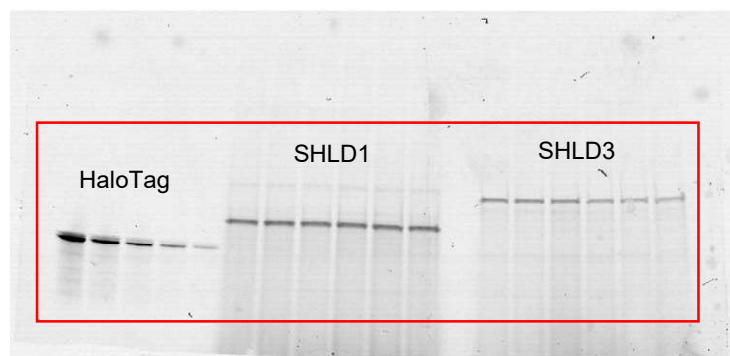

Detection of purified HaloTag, HaloTagged SHLD1, and SHLD3 labeled with JF646

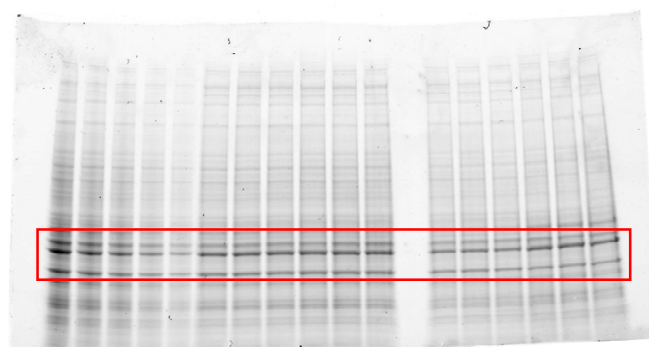

Loading Control
