# Supplementary material for: Systematic analysis of the molecular and biophysical properties of key DNA damage response factors
Source: eLife journal article supplement (doi:10.7554/elife.87086), 2023-06-21

Figure 3-figure supplement 1-source data 1

Figure 3—figure supplement 1A

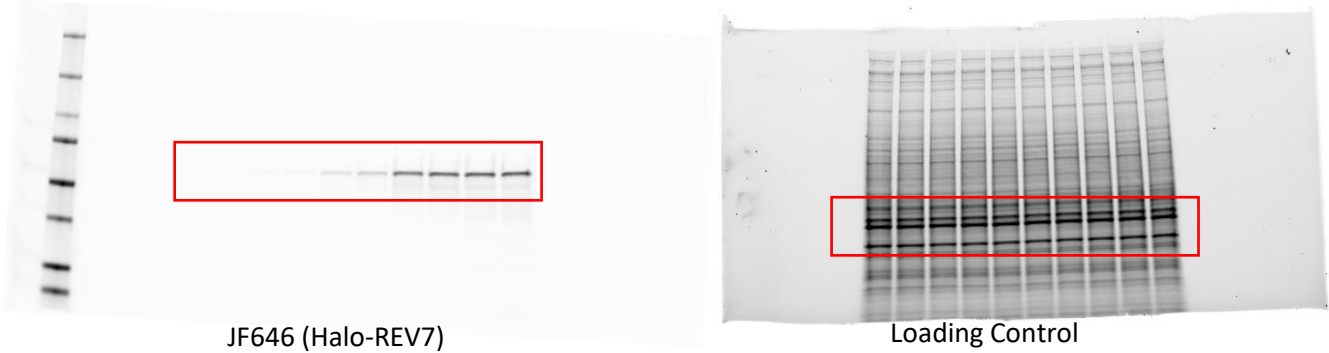

Figure 3—figure supplement 1B

Left Panel:

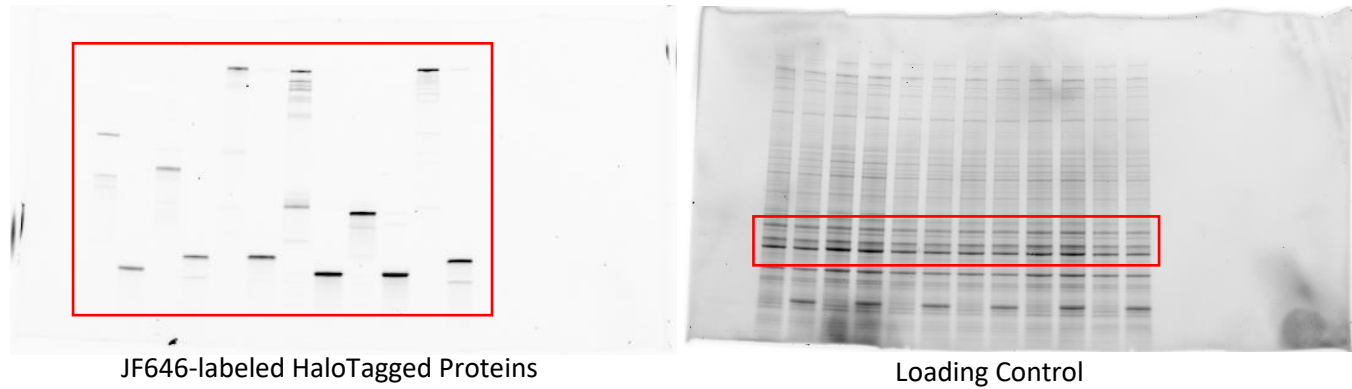

Right Panel:

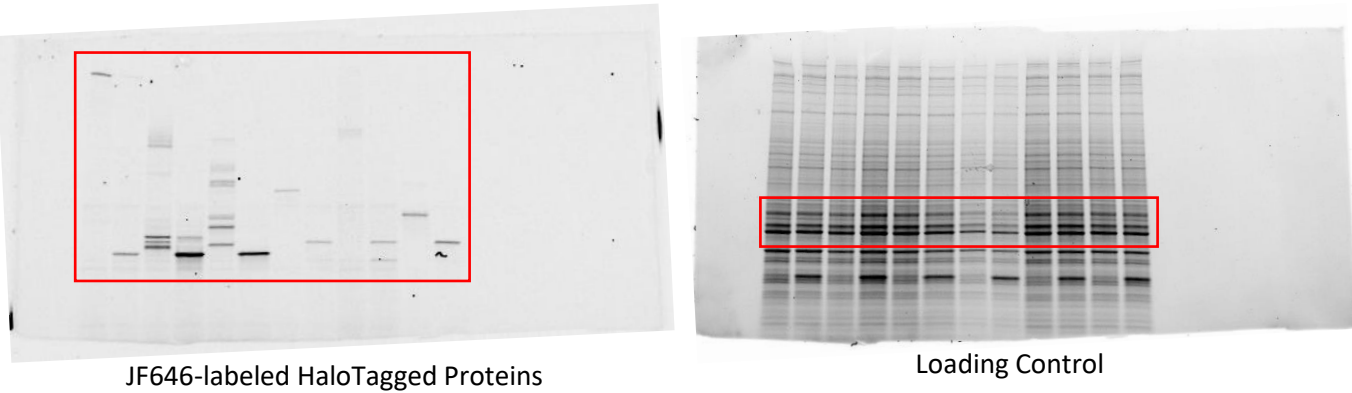

Figure 3—figure supplement 1C

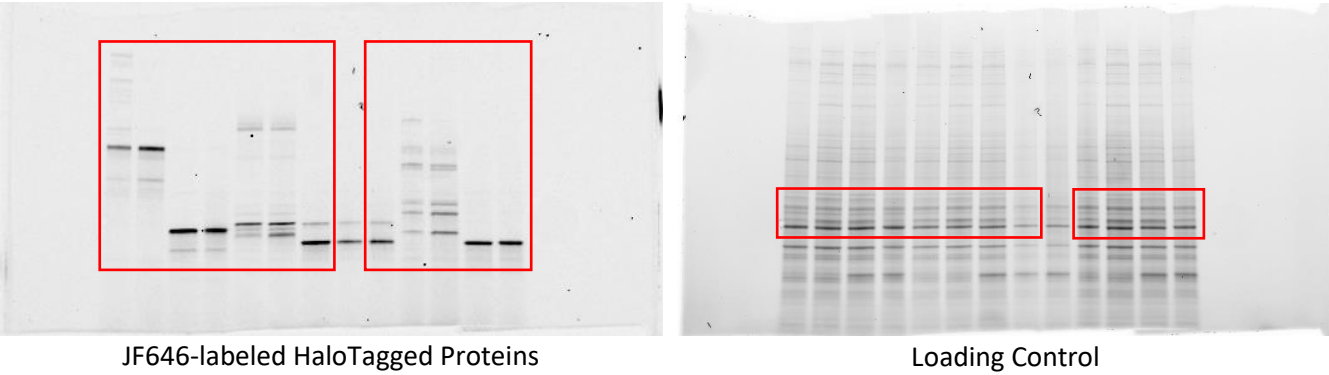

Supplement: fig3-figsupp1-data1 [file elife-87086-fig3-figsupp1-data1-v2.zip]
