# Supplementary figures and images for: Systematic analysis of the molecular and biophysical properties of key DNA damage response factors
Source: eLife journal article supplement (doi:10.7554/elife.87086), 2023-06-21

Figure 1-source data 1

Figure 1B

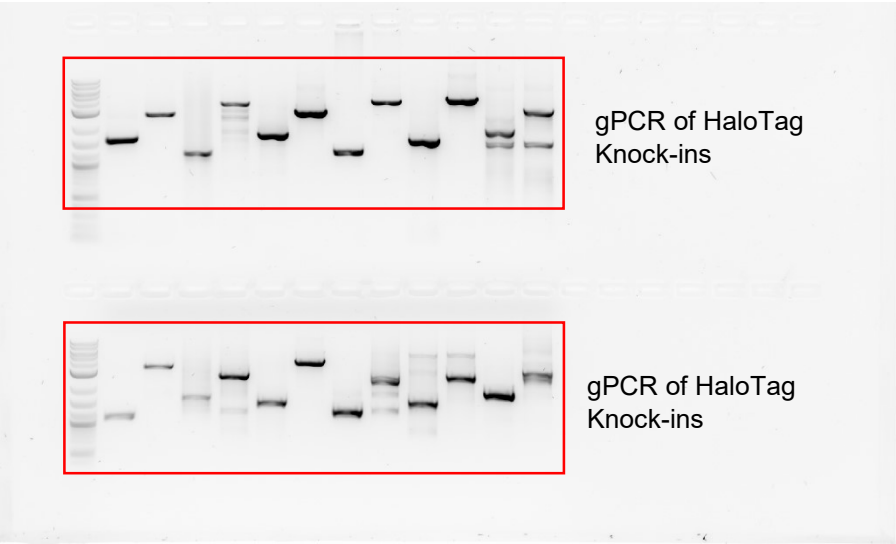

Figure 1C

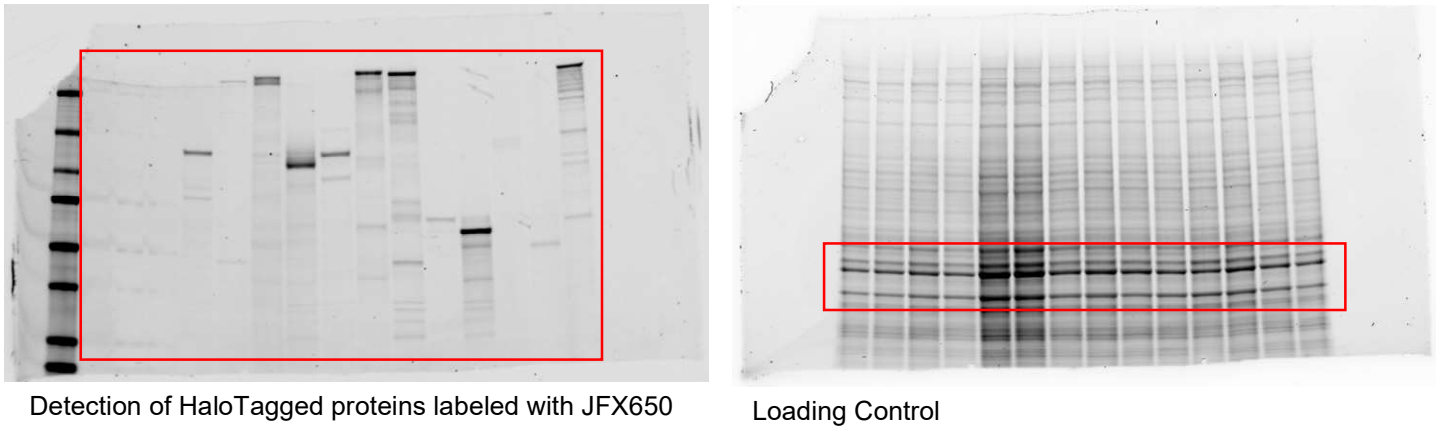

Supplement: fig1-data1 [file elife-87086-fig1-data1-v2.zip]

Figure 5-figure supplement 1-source data 1

Figure 5—figure supplement 1A

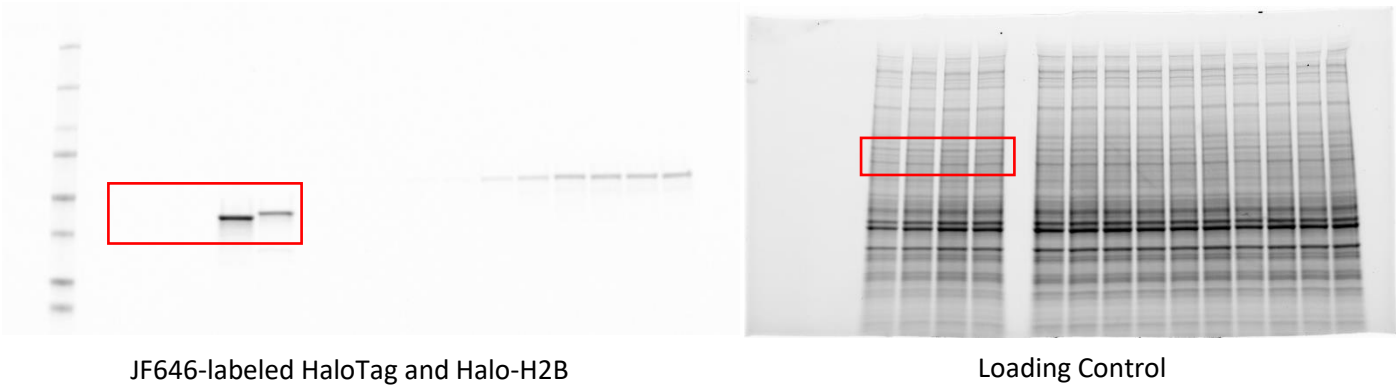

Supplement: fig5-figsupp1-data1 [file elife-87086-fig5-figsupp1-data1-v2.zip]

Figure 7-source data 1

Figure 7B

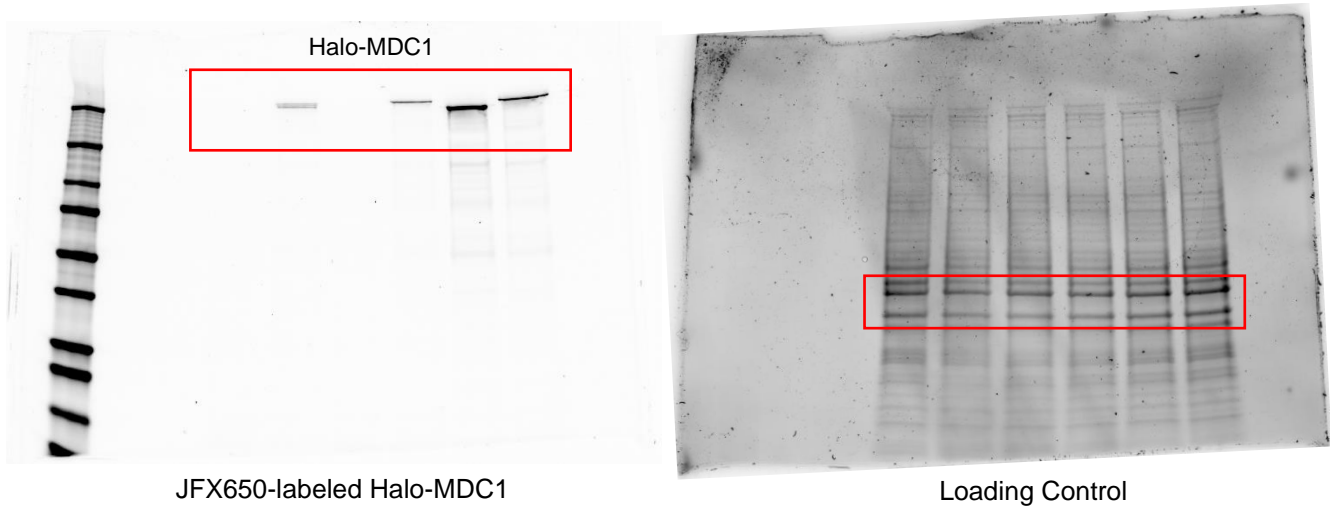

Supplement: fig7-data1 [file elife-87086-fig7-data1-v2.zip]
